# Supplementary material for: Protective desilication of highly siliceous H-ZSM-5 by sole tetraethylammonium hydroxide for the methanol to propylene (MTP) reaction
Source: Royal Society of Chemistry journal article supplement (doi:10.1039/c8ra06786d), 2018-01-01
Supplement: c8ra06786d1.pdf [file c8ra06786d1.pdf]

*Supplementary Information for*

**Protective desilication of highly siliceous H-ZSM-5 by sole  
tetraethylammonium hydroxide for the methanol to propylene  
(MTP) reaction**

Yunpeng Zhang, Minggang Li, Enhui Xing, Ping Wang, Yibin Luo\*, Xingtian Shu

Research Institute of Petroleum Processing, Sinopec, Beijing 100083, China

\*Corresponding author: Prof. Yibin Luo

Address: Research Institute of Petroleum Processing Sinopec, Xueyuan Road 18,  
Beijing, China.

Tel: +86 010-82368237

E-mail: [luoyibin.ripp@sinopec.com](mailto:luoyibin.ripp@sinopec.com) (Y. B. Luo)

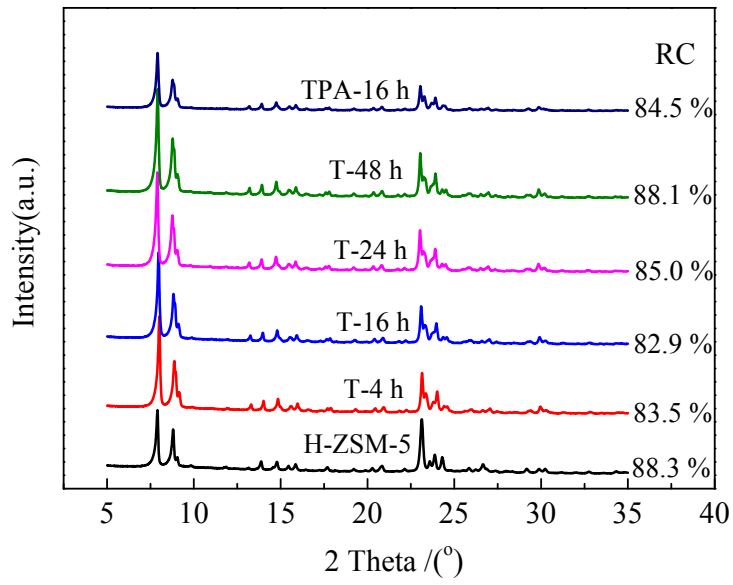

Fig. S1 XRD patterns of the parent, TEAOH-treated H-ZSM-5 and TPA-16 h samples

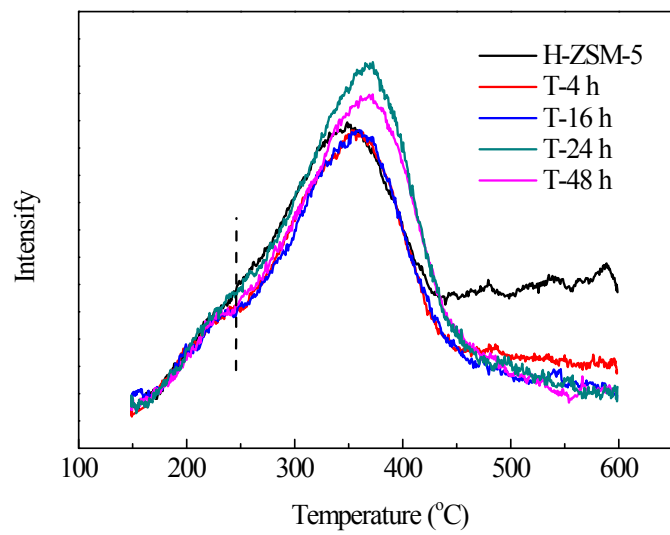

Fig. S2 NH<sub>3</sub>-TPD profiles of the parent and TEAOH-treated H-ZSM-5 samples

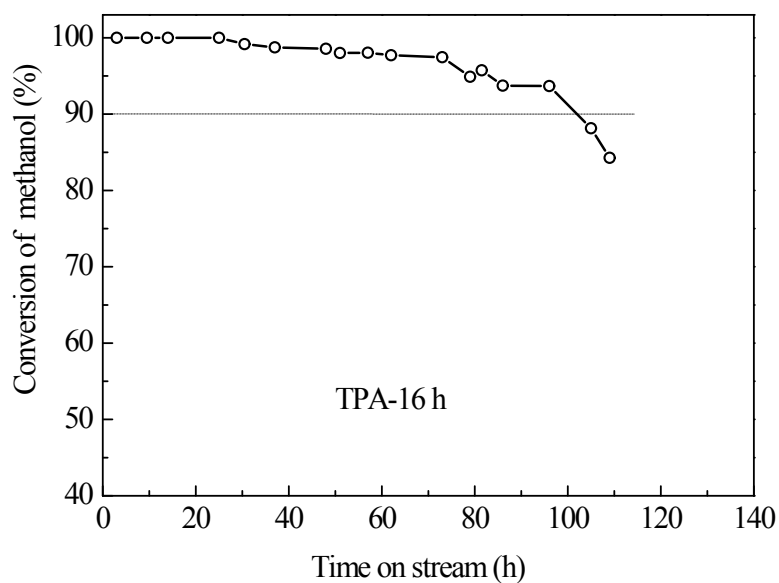

Figure S3 Variation of methanol conversion with the time-on-stream (TOS) over the TPA-16 h sample. (Reaction conditions: T = 480 °C, WHSV = 4.5 h<sup>-1</sup>, P = 0.1 MP,

$$m(\text{H}_2\text{O}) : m(\text{CH}_3\text{OH}) = 1:1)$$

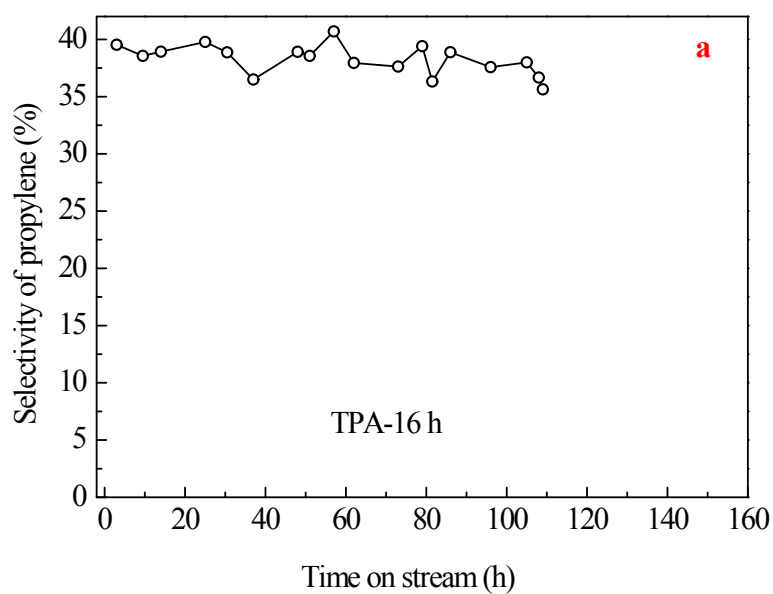

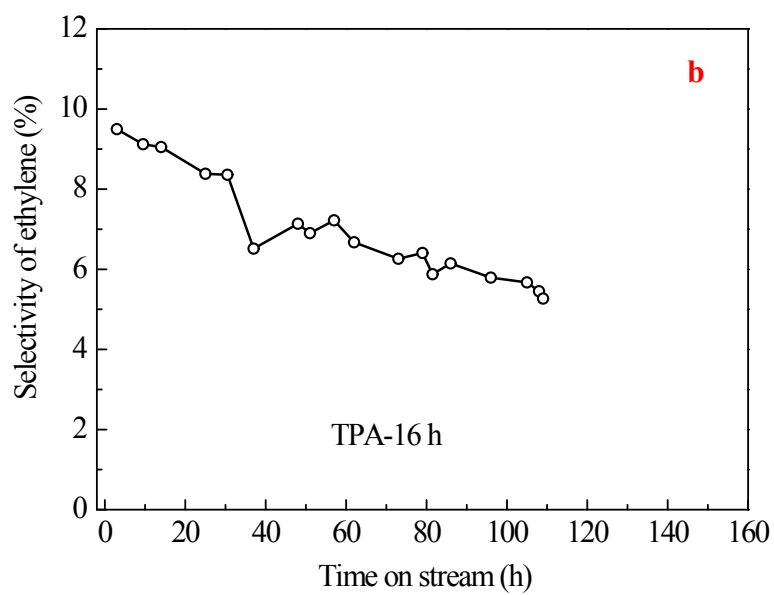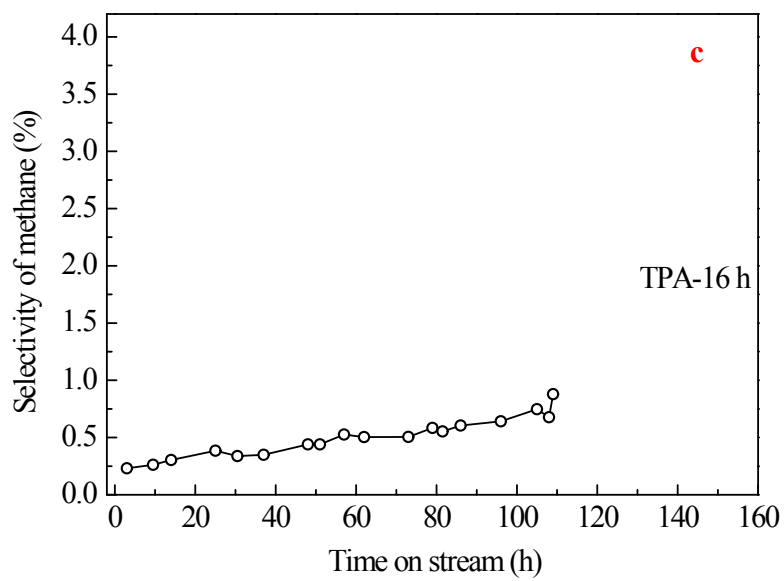

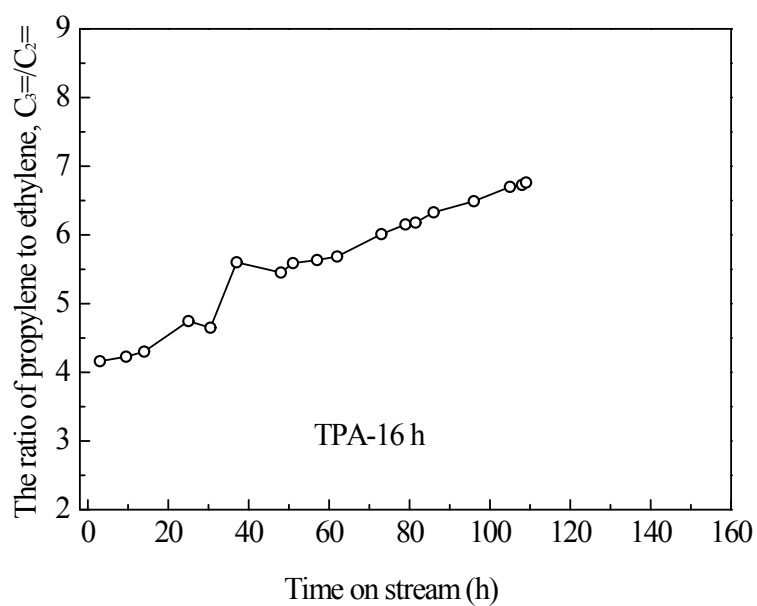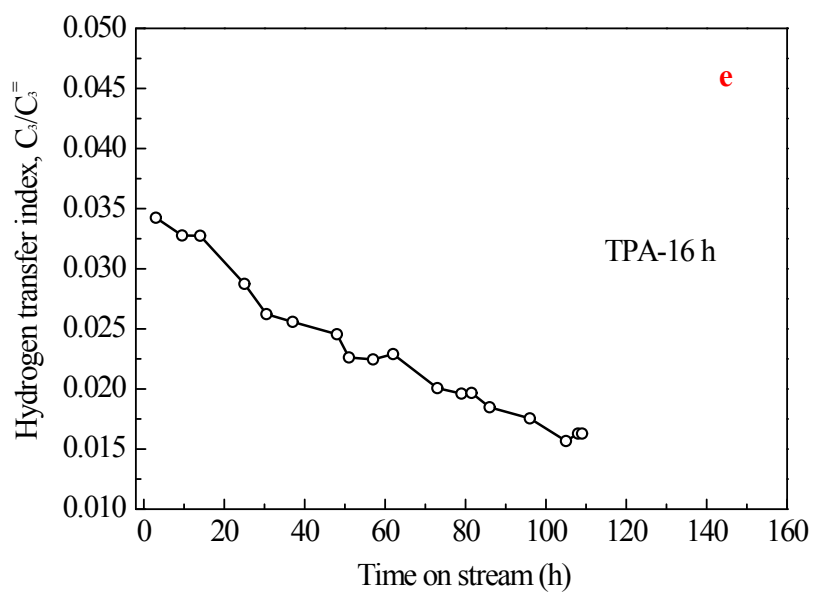

Figure S4 Product selectivity (a: propylene, b: ethylene, c: methane),  $C_3=C_2$  (d) and  $C_3$  hydrogen transfer index (e) of TPA-16 h sample for MTP reaction as a function of time. Reaction conditions:  $T = 480\text{ }^\circ\text{C}$ ,  $\text{WHSV} = 4.5\text{ h}^{-1}$ ,  $P = 0.1\text{ MP}$ ,  $m(\text{H}_2\text{O}) : m(\text{CH}_3\text{OH}) = 1:1$ .
